# Supplementary material for: Biosynthesis of Pyrrole-2-carbaldehyde via Enzymatic CO2 Fixation
Source: MDPI journal article supplement (doi:10.3390/catal12050538), 2022-05-14
Supplement: s1 [file s1]

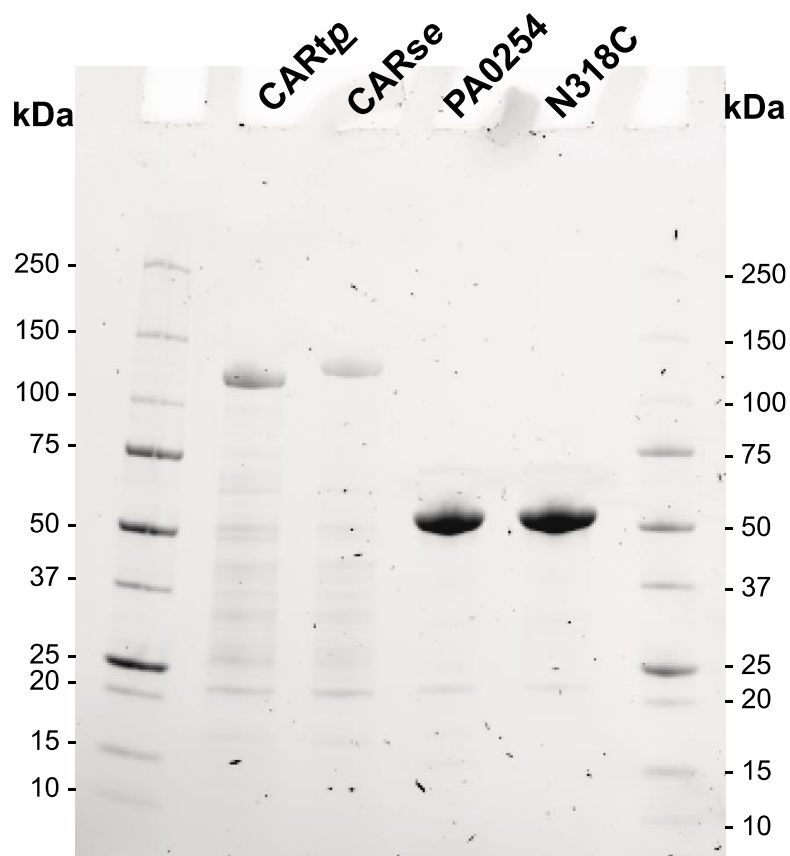

**Figure S1:** SDS-Page analysis of purified biocatalysts. Analysis performed using Mini-Protean TGX Stain-Free Precast gel, 4-20% acrylamide (Biorad), with electrophoresis performed at 250v for 25min. 10µg of protein loaded per sample well. Compared against 10µl of Precision Plus Protein™ Unstained Protein Standard (Biorad). Imaged using a Biorad Chemidock MP on the stain free protein gel setting. Expected molecular weights (kDa) as follows: CARtp: 120.09, CARse: 130.56., PA0254: 56.79, PA0254<sup>N318C</sup>: 57.04.
